# Supplementary material
Source: PubMed Central journal article supplement (PMC8255271)

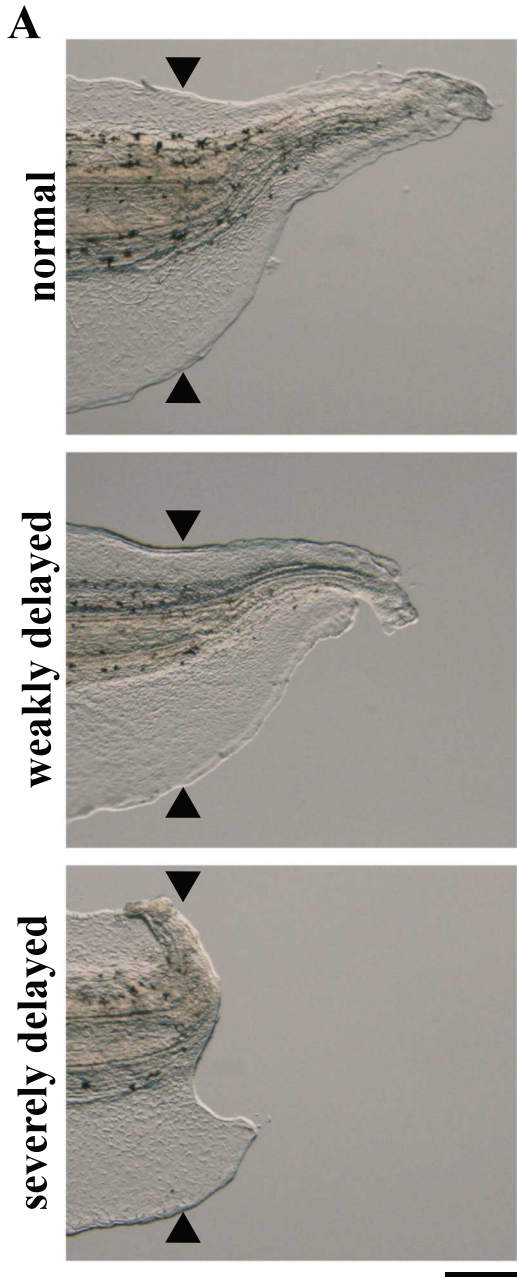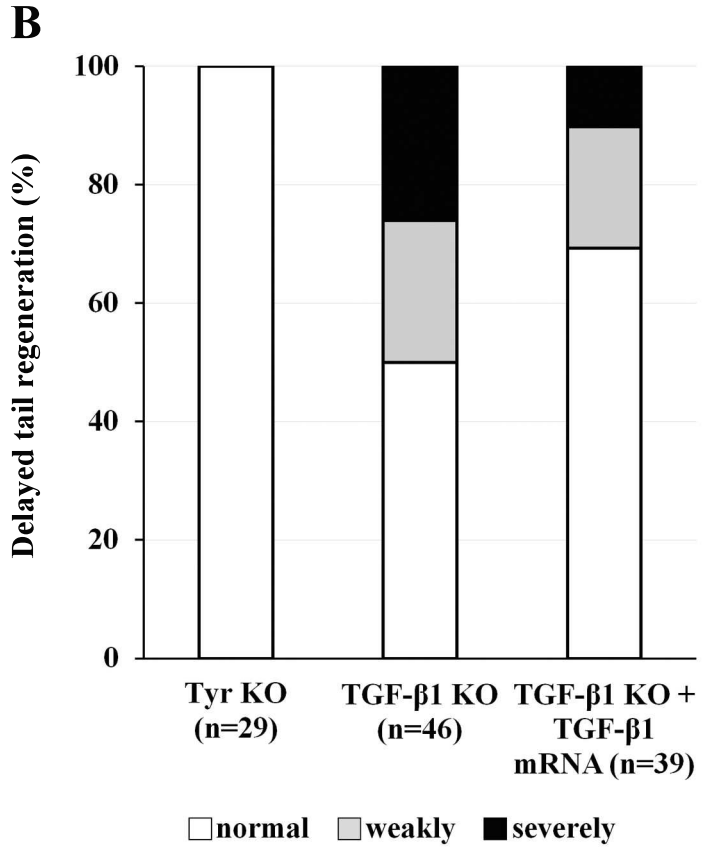

Supplement: NIHMS1712198-supplement-2.pdf [file NIHMS1712198-supplement-2.pdf]
